# Supplementary material
Source: Springer Nature journal article supplement (https://www.springermedizin.de/resource/supplementary/12877_2009_306_MOESM1_ESM.pdf/9439348)

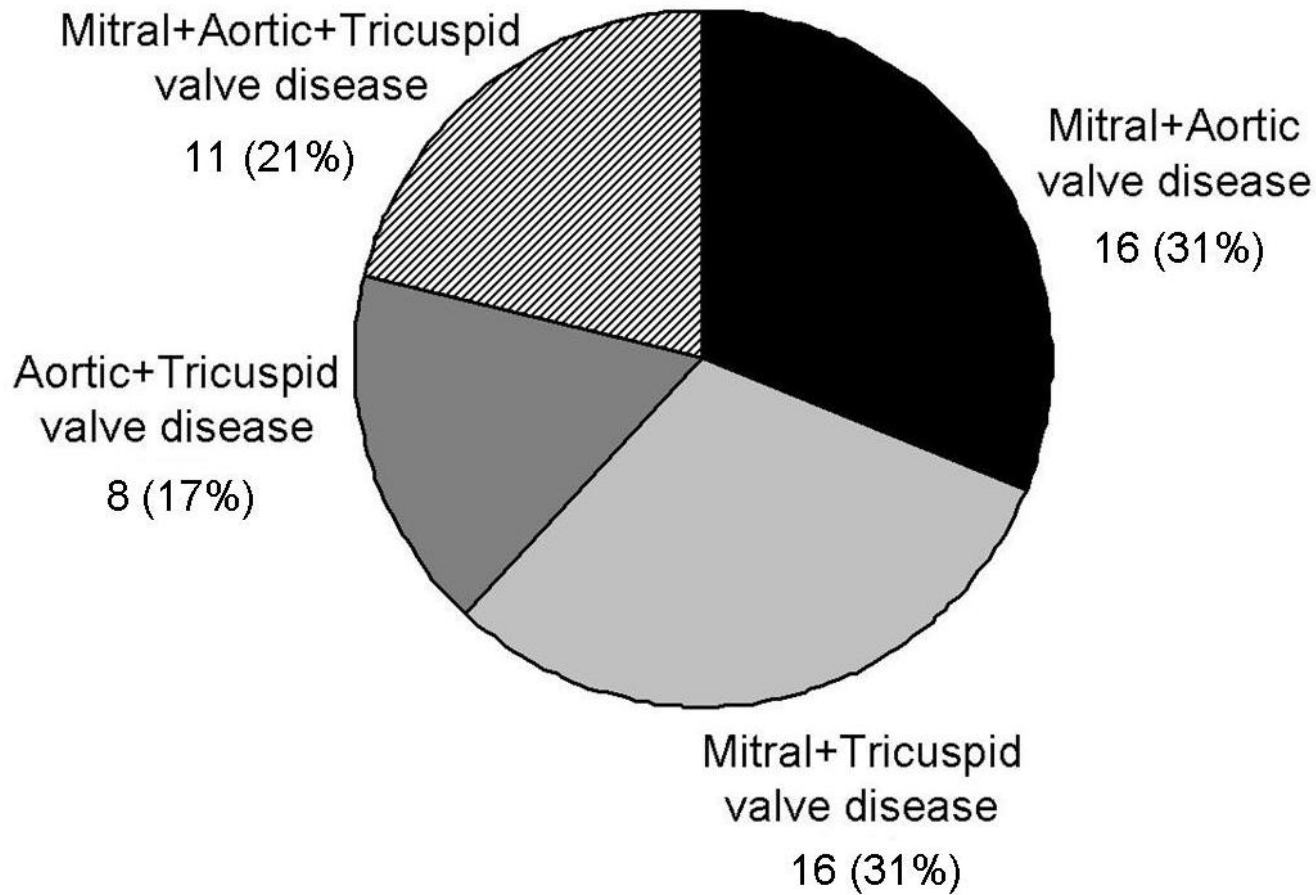

Supplement: MOESM1 [file 9439348]
